# Supplementary material
Source: Springer Nature journal article supplement (https://www.springermedizin.de/resource/supplementary/13054_2011_9391_MOESM1_ESM.pdf/9706096)

## A Monocytes

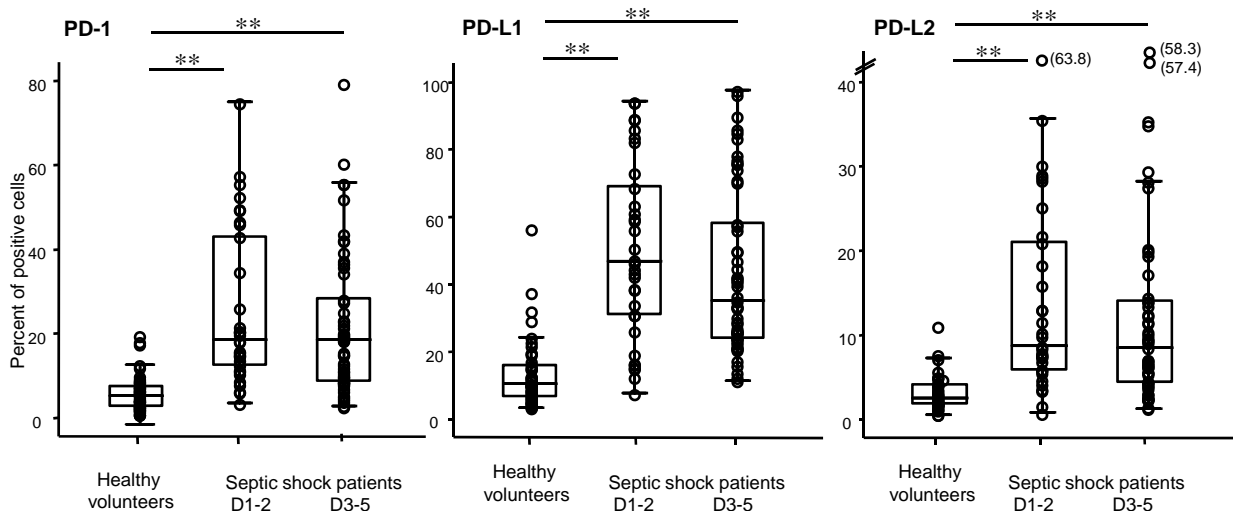

## B CD4+ Lymphocytes

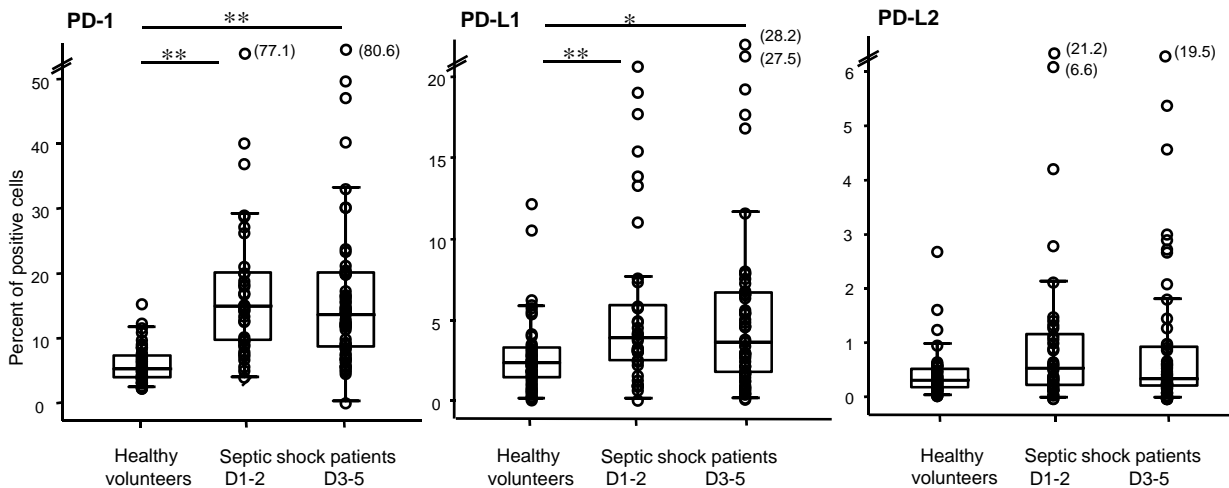

Supplement: MOESM1 [file 9706096]
